# Supplementary material
Source: PubMed Central journal article supplement (PMC4651815)
Supplement: NIHMS733664-supplement-supp_table_1_and_2.pdf [file NIHMS733664-supplement-supp_table_1_and_2.pdf]

**Supplementary Table 1: Lipid Mediator Pathway Genes**

| Human Gene                                                                                 | Gene Symbol | Blood Cells with Major Expression     | References   |
|--------------------------------------------------------------------------------------------|-------------|---------------------------------------|--------------|
| <b>Lipoxygenases (LOX)</b>                                                                 |             |                                       |              |
| 5-LOX                                                                                      | ALOX5       | PMN, monocytes, lymphocytes           | (1, 2)       |
| 5-LOX activating protein                                                                   | ALOX5AP     | PMN, monocytes, lymphocytes           | (3, 4)       |
| 12-LOX                                                                                     | ALOX12      | platelets, mononuclear cells          | (5, 6)       |
| 15-LOX-1                                                                                   | ALOX15      | mononuclear cells, activated PMN      | (7, 8)       |
| <b>Leukotriene pathway enzymes</b>                                                         |             |                                       |              |
| leukotriene A <sub>4</sub> hydrolase                                                       | LTA4H       | Ubiquitous                            | (9-11)       |
| <b>Prostanoid pathway enzymes</b>                                                          |             |                                       |              |
| COX-1/prostaglandin-endoperoxide synthase 1                                                | PTGS1       | ubiquitous                            | (12)         |
| COX-2/prostaglandin-endoperoxide synthase 2                                                | PTGS2       | activated endothelium, PMN, monocytes | (12-14)      |
| prostaglandin D <sub>2</sub> synthase                                                      | PTGDS       | leukocytes                            | (15)         |
| prostaglandin E <sub>2</sub> synthase                                                      | PTGES       | leukocytes                            | (16)         |
| <b>Lipid mediator receptors</b>                                                            |             |                                       |              |
| ALX/formyl peptide receptor 2                                                              | FPR2        | PMN, monocytes, activated T cells     | (17-19)      |
| GPR32 receptor                                                                             | GPR32       | monocytes, PMN                        | (18, 20, 21) |
| ChemR23 receptor                                                                           | CMKLR1      | PMN, macrophages, T cells, tissues    | (22)         |
| BLT1/leukotriene B <sub>4</sub> receptor                                                   | LTB4R       | leukocytes, endothelium               | (23-25)      |
| EP2 receptor                                                                               | PTGER2      | ubiquitous, leukocytes, platelets     | (26, 27)     |
| DP1 receptor                                                                               | PTGDR       | platelets, PMN                        | (28-30)      |
| <b>Lipid mediator inactivation enzymes</b>                                                 |             |                                       |              |
| 15-hydroxyprostaglandin dehydrogenase (15-PGDH)                                            | HPGD        | monocytes, immune cells               | (31-34)      |
| prostaglandin reductase (PGR)/leukotriene B <sub>4</sub> hydrogenase (LTB <sub>4</sub> DH) | PTGR1       | monocytes                             | (35)         |
| CYP4F3                                                                                     | CYP4F3      | PMN                                   | (36, 37)     |

PMN, polymorphonuclear leukocytes

**References:**

1. Matsumoto T, Funk CD, Radmark O et al: Molecular cloning and amino acid sequence of human 5-lipoxygenase. *Proceedings of the National Academy of Sciences of the United States of America* 1988; 85:26-30.
2. Radmark O, Werz O, Steinhilber D et al: 5-lipoxygenase: Regulation of expression and enzyme activity. *Trends in biochemical sciences* 2007; 32:332-341.
3. Dixon RA, Diehl RE, Opas E et al: Requirement of a 5-lipoxygenase-activating protein for leukotriene synthesis. *Nature* 1990; 343:282-284.
4. Newcomer ME, Gilbert NC: Location, location, location: Compartmentalization of early events in leukotriene biosynthesis. *The Journal of biological chemistry* 2010; 285:25109-25114.
5. Funk CD, Furci L, FitzGerald GA: Molecular cloning, primary structure, and expression of the human platelet/erythroleukemia cell 12-lipoxygenase. *Proceedings of the National Academy of Sciences of the United States of America* 1990; 87:5638-5642.
6. Dalli J, Zhu M, Vlasenko NA et al: The novel 13s,14s-epoxy-maresin is converted by human macrophages to maresin 1 (mar1), inhibits leukotriene a4 hydrolase (lta4h), and

- shifts macrophage phenotype. *FASEB journal : official publication of the Federation of American Societies for Experimental Biology* 2013; 27:2573-2583.
7. Izumi T, Radmark O, Jornvall H et al: Purification of two forms of arachidonate 15-lipoxygenase from human leukocytes. *European journal of biochemistry / FEBS* 1991; 202:1231-1238.
  8. Serhan CN, Petasis NA: Resolvins and protectins in inflammation resolution. *Chemical reviews* 2011; 111:5922-5943.
  9. Haeggstrom JZ: Structure, function, and regulation of leukotriene a4 hydrolase. *American journal of respiratory and critical care medicine* 2000; 161:S25-31.
  10. Oh SF, Pillai PS, Recchiuti A et al: Pro-resolving actions and stereoselective biosynthesis of 18s e-series resolvins in human leukocytes and murine inflammation. *The Journal of clinical investigation* 2011; 121:569-581.
  11. Qiu H, Gabrielsen A, Agardh HE et al: Expression of 5-lipoxygenase and leukotriene a4 hydrolase in human atherosclerotic lesions correlates with symptoms of plaque instability. *Proceedings of the National Academy of Sciences of the United States of America* 2006; 103:8161-8166.
  12. Smith WL, DeWitt DL, Garavito RM: Cyclooxygenases: Structural, cellular, and molecular biology. *Annual review of biochemistry* 2000; 69:145-182.
  13. Liao Y, Liu P, Guo F et al: Oxidative burst of circulating neutrophils following traumatic brain injury in human. *PloS one* 2013; 8:e68963.
  14. Levy BD, Clish CB, Schmidt B et al: Lipid mediator class switching during acute inflammation: Signals in resolution. *Nature immunology* 2001; 2:612-619.
  15. Urade Y, Eguchi N: Lipocalin-type and hematopoietic prostaglandin d synthases as a novel example of functional convergence. *Prostaglandins & other lipid mediators* 2002; 68-69:375-382.
  16. Kotz KT, Xiao W, Miller-Graziano C et al: Clinical microfluidics for neutrophil genomics and proteomics. *Nature medicine* 2010; 16:1042-1047.
  17. Fiore S, Maddox JF, Perez HD et al: Identification of a human cDNA encoding a functional high affinity lipoxin a4 receptor. *The Journal of experimental medicine* 1994; 180:253-260.
  18. Krishnamoorthy S, Recchiuti A, Chiang N et al: Resolvin d1 binds human phagocytes with evidence for proresolving receptors. *Proceedings of the National Academy of Sciences of the United States of America* 2010; 107:1660-1665.
  19. Dufton N, Perretti M: Therapeutic anti-inflammatory potential of formyl-peptide receptor agonists. *Pharmacology & therapeutics* 2010; 127:175-188.
  20. Dalli J, Winkler JW, Colas RA et al: Resolvin d3 and aspirin-triggered resolvin d3 are potent immunoresolvents. *Chemistry & biology* 2013; 20:188-201.
  21. Chiang N, Fredman G, Backhed F et al: Infection regulates pro-resolving mediators that lower antibiotic requirements. *Nature* 2012; 484:524-528.
  22. Arita M, Bianchini F, Aliberti J et al: Stereochemical assignment, antiinflammatory properties, and receptor for the omega-3 lipid mediator resolvin e1. *The Journal of experimental medicine* 2005; 201:713-722.
  23. Yokomizo T, Izumi T, Chang K et al: A G-protein-coupled receptor for leukotriene b4 that mediates chemotaxis. *Nature* 1997; 387:620-624.
  24. Wan M, Godson C, Guiry PJ et al: Leukotriene b4/antimicrobial peptide ll-37 proinflammatory circuits are mediated by blt1 and fpr2/alx and are counterregulated by

- lipoxin a4 and resolvin e1. *FASEB journal : official publication of the Federation of American Societies for Experimental Biology* 2011; 25:1697-1705.
25. Back M, Dahlen SE, Drazen JM et al: International union of basic and clinical pharmacology. Lxxxiv: Leukotriene receptor nomenclature, distribution, and pathophysiological functions. *Pharmacological reviews* 2011; 63:539-584.
  26. Bastien L, Sawyer N, Grygorczyk R et al: Cloning, functional expression, and characterization of the human prostaglandin e2 receptor ep2 subtype. *The Journal of biological chemistry* 1994; 269:11873-11877.
  27. Foudi N, Gomez I, Benyahia C et al: Prostaglandin e2 receptor subtypes in human blood and vascular cells. *European journal of pharmacology* 2012; 695:1-6.
  28. Woodward DF, Jones RL, Narumiya S: International union of basic and clinical pharmacology. Lxxxiii: Classification of prostanoid receptors, updating 15 years of progress. *Pharmacological reviews* 2011; 63:471-538.
  29. Vong L, Ferraz JG, Panaccione R et al: A pro-resolution mediator, prostaglandin d(2), is specifically up-regulated in individuals in long-term remission from ulcerative colitis. *Proceedings of the National Academy of Sciences of the United States of America* 2010; 107:12023-12027.
  30. Boie Y, Sawyer N, Slipetz DM et al: Molecular cloning and characterization of the human prostanoid dp receptor. *The Journal of biological chemistry* 1995; 270:18910-18916.
  31. Maddox JF, Serhan CN: Lipoxin a4 and b4 are potent stimuli for human monocyte migration and adhesion: Selective inactivation by dehydrogenation and reduction. *The Journal of experimental medicine* 1996; 183:137-146.
  32. Tai HH, Ensor CM, Tong M et al: Prostaglandin catabolizing enzymes. *Prostaglandins & other lipid mediators* 2002; 68-69:483-493.
  33. Arita M, Oh SF, Chonan T et al: Metabolic inactivation of resolvin e1 and stabilization of its anti-inflammatory actions. *The Journal of biological chemistry* 2006; 281:22847-22854.
  34. Sun YP, Oh SF, Uddin J et al: Resolvin d1 and its aspirin-triggered 17r epimer. Stereochemical assignments, anti-inflammatory properties, and enzymatic inactivation. *The Journal of biological chemistry* 2007; 282:9323-9334.
  35. Clish CB, Levy BD, Chiang N et al: Oxidoreductases in lipoxin a4 metabolic inactivation: A novel role for 15-onoprostaglandin 13-reductase/leukotriene b4 12-hydroxydehydrogenase in inflammation. *The Journal of biological chemistry* 2000; 275:25372-25380.
  36. Kikuta Y, Kusunose E, Endo K et al: A novel form of cytochrome p-450 family 4 in human polymorphonuclear leukocytes. Cdna cloning and expression of leukotriene b4 omega-hydroxylase. *The Journal of biological chemistry* 1993; 268:9376-9380.
  37. Brandfellner HM, Ruparel SB, Gelfond JA et al: Major blunt trauma evokes selective upregulation of oxidative enzymes in circulating leukocytes. *Shock* 2013; 40:182-187.

**Supplementary Table 2: Expression values for 18 lipid mediator pathway genes (mean ± SD)**

|                 | HC              |    | day 0                 | day 1                 | day 4                 | day 7                 | day 14                | day 21             | day 28              |
|-----------------|-----------------|----|-----------------------|-----------------------|-----------------------|-----------------------|-----------------------|--------------------|---------------------|
| <i>ALOX12*</i>  | 138.3 ± 44.6    | UC | 108.3 ± 7.2           | 131.0 ± 7.8           | 156.8 ± 11.8          | 278.4 ± 29.8          | 192.2 ± 21.2          | 156.8 ± 20.8       | 163.6 ± 14.1        |
|                 |                 | C  | 111.3 ± 13.0          | 148.4 ± 12.6          | 179.6 ± 19.9          | 229.0 ± 26.5          | 262.7 ± 32.0          | 216.4 ± 29.9       | 156.2 ± 13.4        |
| <i>ALOX5</i>    | 110.7 ± 17.1    | UC | 126.7 ± 4.6           | 116.1 ± 4.2           | 113.8 ± 4.1           | 107.5 ± 4.1           | 109.2 ± 6.4           | 102.3 ± 4.8        | 106.4 ± 4.1         |
|                 |                 | C  | 121.0 ± 2.8           | 114.7 ± 3.0           | 112.1 ± 3.1           | 106.5 ± 3.3           | 106.3 ± 3.4           | 101.8 ± 3.4        | 101.2 ± 3.2         |
| <i>ALOX15</i>   | 78.9 ± 49.2     | UC | 47.1 ± 0.9            | 54.9 ± 2.4            | 65.5 ± 3.8            | 69.0 ± 3.6            | 79.9 ± 8.8            | 77.1 ± 7.6         | 77.4 ± 8.2          |
|                 |                 | C  | 49.0 ± 1.1            | 51.3 ± 1.7            | 65.7 ± 2.3            | 63.1 ± 2.5            | 63.4 ± 3.7            | 71.6 ± 4.1         | 79.2 ± 6.5          |
| <i>PTGS1</i>    | 57.4 ± 14.8     | UC | 71.7 ± 2.6            | 81.0 ± 4.2            | 96.5 ± 6.6            | 111.5 ± 12.0          | 118.0 ± 15.1          | 98.9 ± 10.8        | 90.4 ± 5.0          |
|                 |                 | C  | 73.9 ± 2.6            | 80.0 ± 3.1            | 104.8 ± 6.2           | 135.8 ± 10.5          | 122.4 ± 16.5          | 94.6 ± 12.9        | 98.5 ± 11.1         |
| <i>PTGS2*</i>   | 651.8 ± 411.6   | UC | 421.5 ± 39.3          | <b>225.6 ± 24.4</b>   | <b>296.2 ± 38.1</b>   | <b>334.6 ± 60.9</b>   | 175.6 ± 36.2          | 675.5 ± 213.9      | 622.2 ± 235.6       |
|                 |                 | C  | 420.3 ± 41.9          | <b>151.5 ± 19.4</b>   | <b>159.3 ± 23.1</b>   | <b>145.4 ± 28.4</b>   | 277.7 ± 51.8          | 358.3 ± 58.9       | 507.3 ± 132.3       |
| <i>PTGES*</i>   | 58.7 ± 8.2      | UC | <b>115.2 ± 4.4</b>    | <b>86.5 ± 4.3</b>     | 77.3 ± 3.4            | 81.0 ± 2.7            | <b>75.0 ± 2.4</b>     | 74.8 ± 4.8         | 59.2 ± 6.6          |
|                 |                 | C  | <b>132.5 ± 5.4</b>    | <b>99.1 ± 4.4</b>     | 79.8 ± 2.5            | 81.4 ± 2.7            | <b>85.0 ± 2.3</b>     | 76.5 ± 2.7         | 71.7 ± 2.7          |
| <i>PTGDS*</i>   | 131.1 ± 49.1    | UC | 85.0 ± 2.3            | 88.7 ± 2.1            | 101.7 ± 4.5           | 119.8 ± 5.7           | 119.8 ± 14.5          | 104.7 ± 11.7       | <b>87.5 ± 5.8</b>   |
|                 |                 | C  | 90.8 ± 4.6            | 92.0 ± 4.6            | 107.3 ± 8.1           | 106.2 ± 6.3           | 112.3 ± 9.3           | 113.9 ± 9.0        | <b>125.4 ± 13.8</b> |
| <i>ALOX5AP*</i> | 2235.6 ± 1153.2 | UC | 8223.5 ± 282.5        | <b>6802.7 ± 319.9</b> | <b>5291.9 ± 258.5</b> | <b>4964.2 ± 249.3</b> | <b>4891.4 ± 356.6</b> | 5053.6 ± 361.0     | 3360.1 ± 1390.2     |
|                 |                 | C  | 8739.9 ± 261.6        | <b>7729.1 ± 259.5</b> | <b>6566.3 ± 241.3</b> | <b>7008.2 ± 271.7</b> | <b>6355.8 ± 268.5</b> | 5297.0 ± 320.9     | 5412.1 ± 356.2      |
| <i>LTA4H*</i>   | 2813.7 ± 530.4  | UC | <b>3734.2 ± 199.3</b> | 5024.1 ± 156.3        | 5913.4 ± 221.1        | 5930.2 ± 211.5        | 5535.0 ± 304.2        | 4818.8 ± 544.6     | 3774.0 ± 277.3      |
|                 |                 | C  | <b>3208.0 ± 141.9</b> | 4796.4 ± 195.0        | 6466.3 ± 254.0        | 6471.5 ± 238.6        | 5546.4 ± 206.2        | 4959.3 ± 243.2     | 4201.8 ± 247.0      |
| <i>GPR32</i>    | 59.7 ± 11.4     | UC | 64.9 ± 1.0            | 64.9 ± 1.0            | 66.7 ± 1.3            | 67.7 ± 1.3            | 63.2 ± 2.3            | 62.1 ± 1.7         | <b>58.1 ± 3.6</b>   |
|                 |                 | C  | 65.8 ± 1.2            | 65.9 ± 1.0            | 68.0 ± 1.6            | 67.5 ± 1.2            | 68.2 ± 1.2            | 66.1 ± 1.7         | <b>66.7 ± 2.0</b>   |
| <i>FPR2*</i>    | 270.2 ± 251.1   | UC | 1774.4 ± 122.1        | 1383.3 ± 96.9         | 1200.6 ± 90.9         | 970.0 ± 98.1          | 919.6 ± 150.7         | 1004.0 ± 142.4     | 599.4 ± 373.9       |
|                 |                 | C  | 1972.5 ± 136.1        | 1403.4 ± 89.8         | 1136.4 ± 82.1         | 1166.8 ± 80.8         | 1067.8 ± 75.5         | 1038.3 ± 79.1      | 1060.1 ± 111.6      |
| <i>CMKLR1</i>   | 45.3 ± 5.9      | UC | 48.1 ± 0.7            | 46.6 ± 0.7            | 45.6 ± 0.8            | 46.1 ± 0.7            | 43.5 ± 1.4            | 45.7 ± 1.9         | 41.5 ± 3.9          |
|                 |                 | C  | 48.2 ± 0.9            | 47.2 ± 0.9            | 47.2 ± 0.9            | 45.8 ± 1.0            | 45.2 ± 1.1            | 46.1 ± 1.2         | 44.3 ± 1.1          |
| <i>PTGER2*</i>  | 470.3 ± 105.3   | UC | 351.0 ± 18.9          | <b>441.3 ± 17.6</b>   | <b>428.5 ± 20.6</b>   | 424.8 ± 16.5          | 433.9 ± 31.2          | 472.9 ± 27.6       | <b>572.6 ± 36.5</b> |
|                 |                 | C  | 373.4 ± 25.3          | <b>521.4 ± 26.8</b>   | <b>509.6 ± 28.0</b>   | 472.0 ± 22.6          | 449.7 ± 22.5          | 440.7 ± 28.8       | <b>396.0 ± 30.2</b> |
| <i>PTGDR</i>    | 251.9 ± 120.2   | UC | 60.0 ± 3.7            | 60.8 ± 3.5            | 53.7 ± 2.8            | 58.4 ± 3.8            | 67.2 ± 7.1            | 80.5 ± 80.4        | 131.0 ± 46.6        |
|                 |                 | C  | 61.8 ± 4.1            | 51.9 ± 2.9            | 47.4 ± 2.5            | 51.1 ± 2.6            | 62.9 ± 4.6            | 69.4 ± 6.0         | 77.9 ± 6.5          |
| <i>LTBAR*</i>   | 311.1 ± 114.9   | UC | 996.9 ± 37.9          | <b>1010.1 ± 35.4</b>  | <b>782.5 ± 41.8</b>   | <b>603.0 ± 35.6</b>   | <b>585.4 ± 63.0</b>   | 636.3 ± 50.5       | 462.9 ± 153.7       |
|                 |                 | C  | 1019.0 ± 39.4         | <b>1132.6 ± 33.4</b>  | <b>897.0 ± 31.1</b>   | <b>835.6 ± 31.1</b>   | <b>805.7 ± 43.0</b>   | 661.4 ± 44.8       | 652.0 ± 46.7        |
| <i>HPGD*</i>    | 59.3 ± 19.3     | UC | 278.6 ± 36.9          | <b>300.5 ± 28.3</b>   | <b>133.5 ± 21.2</b>   | <b>49.9 ± 10.8</b>    | 62.7 ± 13.9           | 55.2 ± 14.1        | 92.6 ± 7.9          |
|                 |                 | C  | 343.2 ± 59.3          | <b>516.2 ± 60.8</b>   | <b>235.6 ± 33.1</b>   | <b>160.6 ± 37.6</b>   | 82.9 ± 24.7           | 68.1 ± 22.3        | 72.0 ± 52.7         |
| <i>PTGRI*</i>   | 103.4 ± 44.9    | UC | 89.5 ± 2.9            | <b>90.3 ± 3.0</b>     | 99.2 ± 4.0            | 99.8 ± 4.1            | <b>92.7 ± 6.1</b>     | <b>89.5 ± 3.3</b>  | <b>59.7 ± 13.1</b>  |
|                 |                 | C  | 95.3 ± 3.9            | <b>104.4 ± 4.4</b>    | 111.2 ± 5.3           | 105.6 ± 4.5           | <b>109.9 ± 6.0</b>    | <b>106.0 ± 7.1</b> | <b>108.5 ± 7.0</b>  |
| <i>CYP4F3*</i>  | 123.3 ± 40.7    | UC | 296.3 ± 14.6          | <b>194.9 ± 9.7</b>    | 212.2 ± 13.1          | 272.0 ± 15.7          | 306.0 ± 36.1          | 283.0 ± 25.5       | 160.1 ± 88.7        |
|                 |                 | C  | 284.6 ± 18.8          | <b>165.4 ± 6.9</b>    | 220.0 ± 13.8          | 304.4 ± 17.1          | 272.4 ± 13.4          | 255.6 ± 17.7       | 281.2 ± 25.3        |

HC: healthy controls; UC: uncomplicated group; C: complicated group. \*indicates significant overall F-test between uncomplicated and complicated groups. Bolded values indicate significant differences between complicated and uncomplicated groups on a specific day.
